# Supplementary material
Source: PubMed Central journal article supplement (PMC7860061)
Supplement: ao0c05142_si_001.pdf [file ao0c05142_si_001.pdf]

## Supporting Information

# Polymerized Luteolin Nanoparticles: Synthesis, Structure Elucidation and Anti-Inflammatory Activity

*Parichat Tawornchat,<sup>†,‡</sup> Thitiporn Pattarakankul,<sup>||</sup> Tanapat Palaga,<sup>§</sup> Varol Intasanta,<sup>#</sup>*

*Supason Wanichwecharungruang<sup>\*,†,‡,||</sup>*

<sup>†</sup> Department of Chemistry, Faculty of Science, Chulalongkorn University, Bangkok 10330, Thailand

<sup>‡</sup> Center of Excellence on Petrochemical and Materials Technology, Chulalongkorn University, Bangkok 10330, Thailand

<sup>§</sup> Department of Microbiology, Faculty of Science, Chulalongkorn University, Bangkok 10330, Thailand.

<sup>#</sup> National Nanotechnology Center, National Science and Technology Development Agency, Pathumthani 12120, Thailand

<sup>||</sup> Center of Excellence in Advanced Materials and Biointerfaces, Chulalongkorn University, Bangkok 10330, Thailand

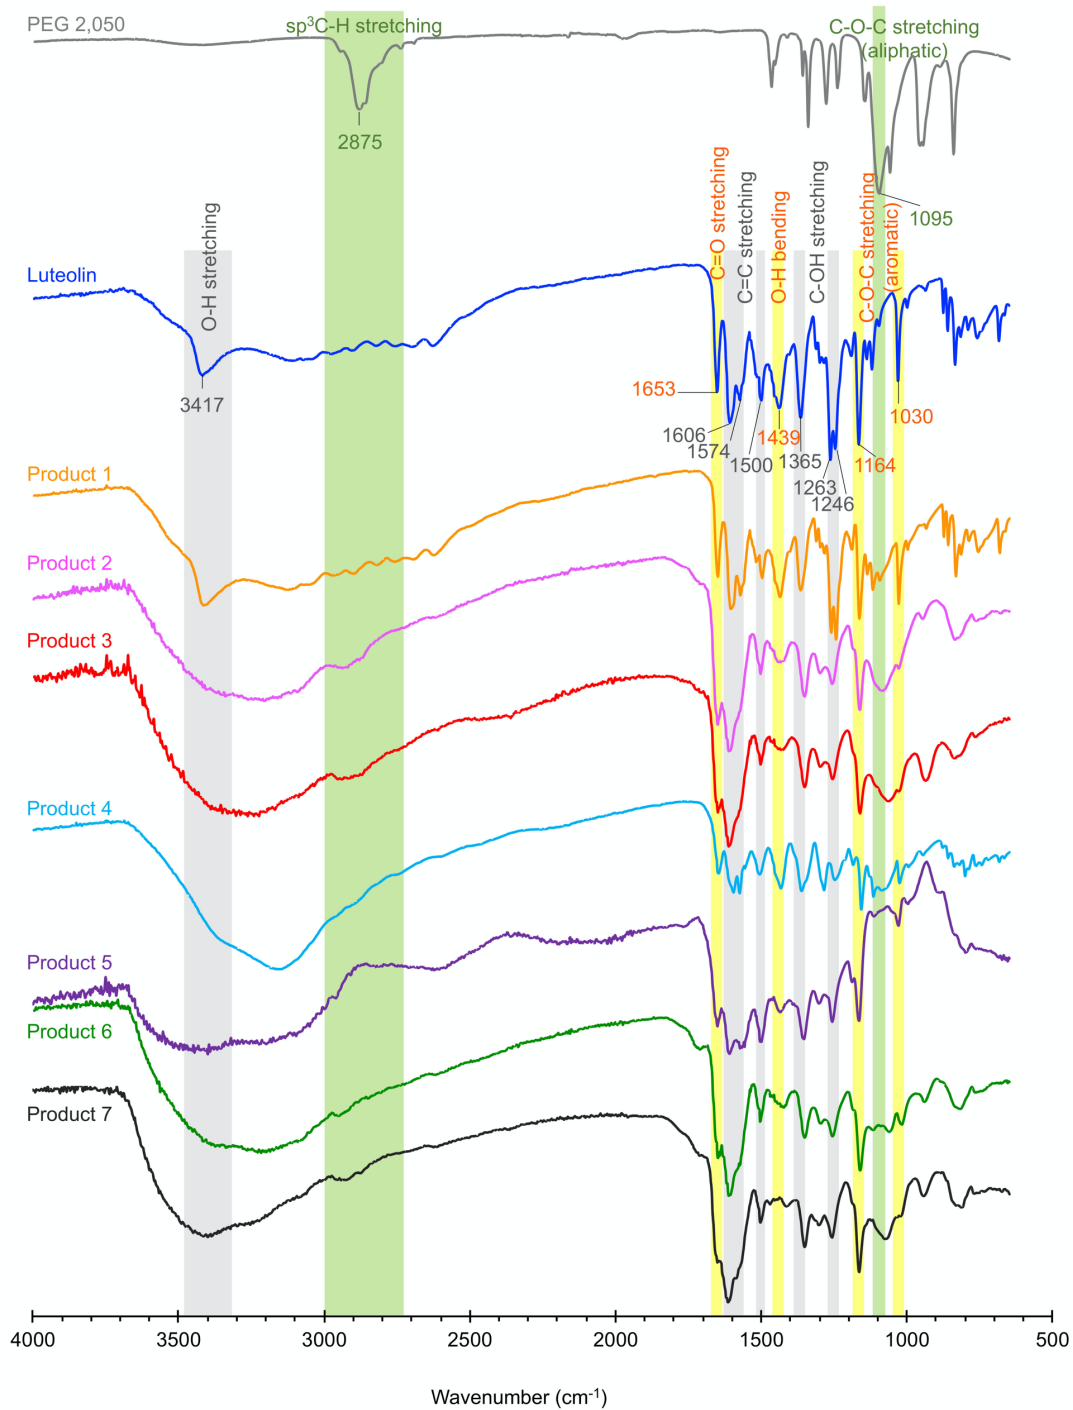

**Figure S1.** IR spectra of luteolin, and products prepared under various conditions: no HRP | H<sub>2</sub>O<sub>2</sub> | PEG 2050 (Product 1); 1.7% HRP | H<sub>2</sub>O<sub>2</sub> | PEG 2050 (Product 2); 3.3% HRP | H<sub>2</sub>O<sub>2</sub> | PEG 2050 (Product 3); 3.3% HRP | no H<sub>2</sub>O<sub>2</sub> | PEG 2050 (Product 4); 3.3% HRP | H<sub>2</sub>O<sub>2</sub> | no PEG (Product 5); 3.3% HRP | H<sub>2</sub>O<sub>2</sub> | PEG 200 (Product 6); 3.3% HRP | H<sub>2</sub>O<sub>2</sub> | PEG 35000 (Product 7).

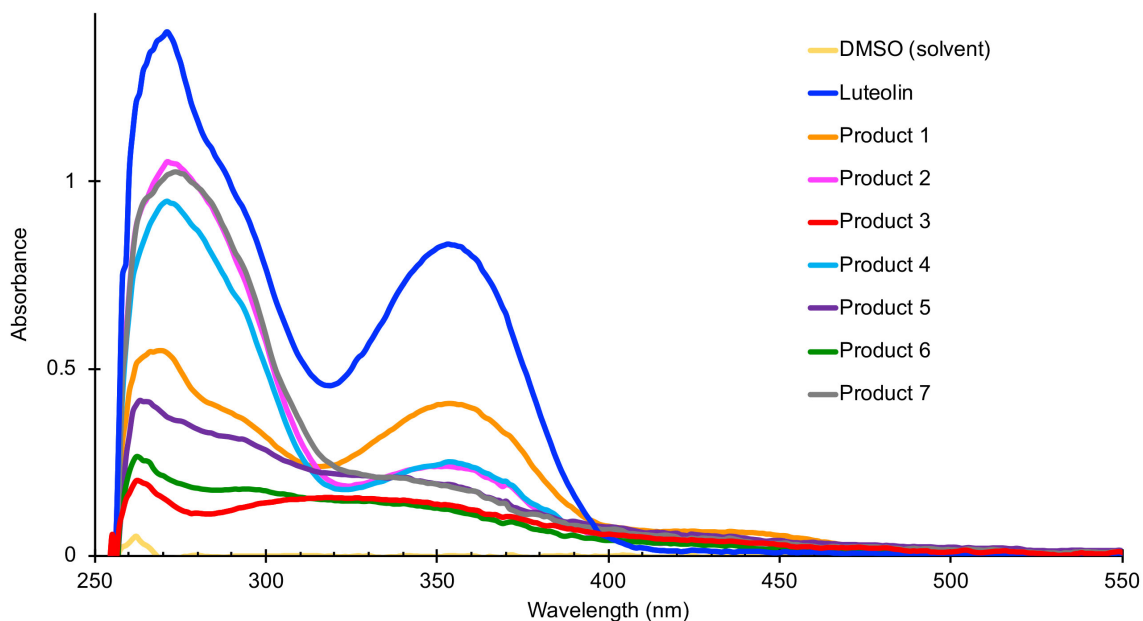

**Figure S2.** UV spectra (10  $\mu\text{g/mL}$ , DMSO) of luteolin, and products prepared under various conditions: no HRP |  $\text{H}_2\text{O}_2$  | PEG 2050 (Product 1); 1.7% HRP |  $\text{H}_2\text{O}_2$  | PEG 2050 (Product 2); 3.3% HRP |  $\text{H}_2\text{O}_2$  | PEG 2050 (Product 3); 3.3% HRP | no  $\text{H}_2\text{O}_2$  | PEG 2050 (Product 4); 3.3% HRP |  $\text{H}_2\text{O}_2$  | no PEG (Product 5); 3.3% HRP |  $\text{H}_2\text{O}_2$  | PEG 200 (Product 6); 3.3% HRP |  $\text{H}_2\text{O}_2$  | PEG 35000 (Product 7).

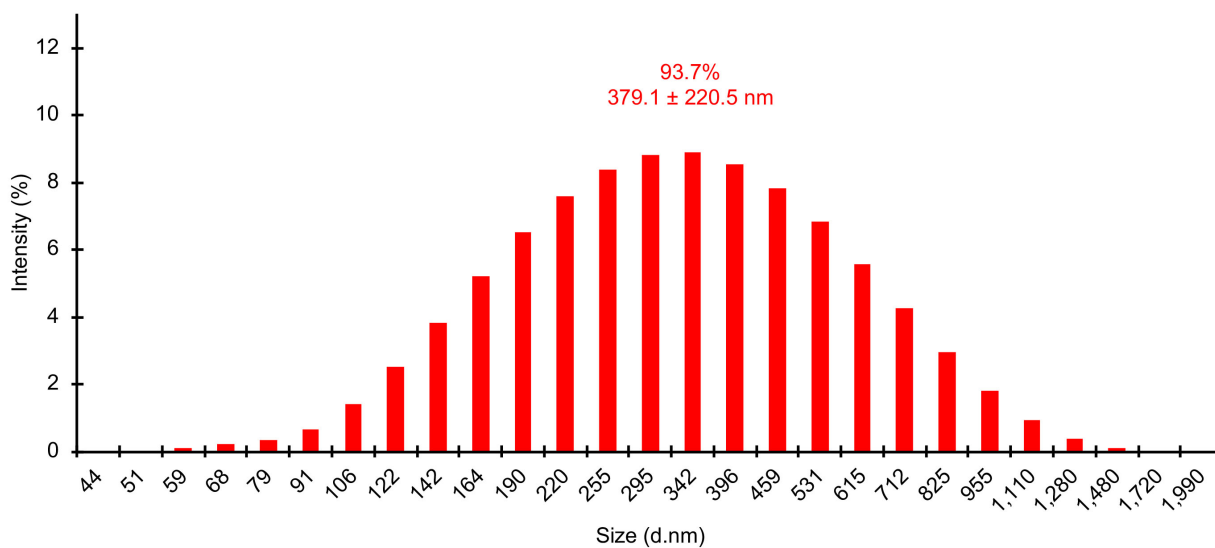

**Figure S3.** Particle size distribution of polylyuteolin nanoparticles (Product 3) in water. Measurement was performed by dynamic light scattering technique. The graph represents average plot from three different measurements. Average size is  $379.1 \pm 220.5$  nm and the polydispersity index is 0.338.

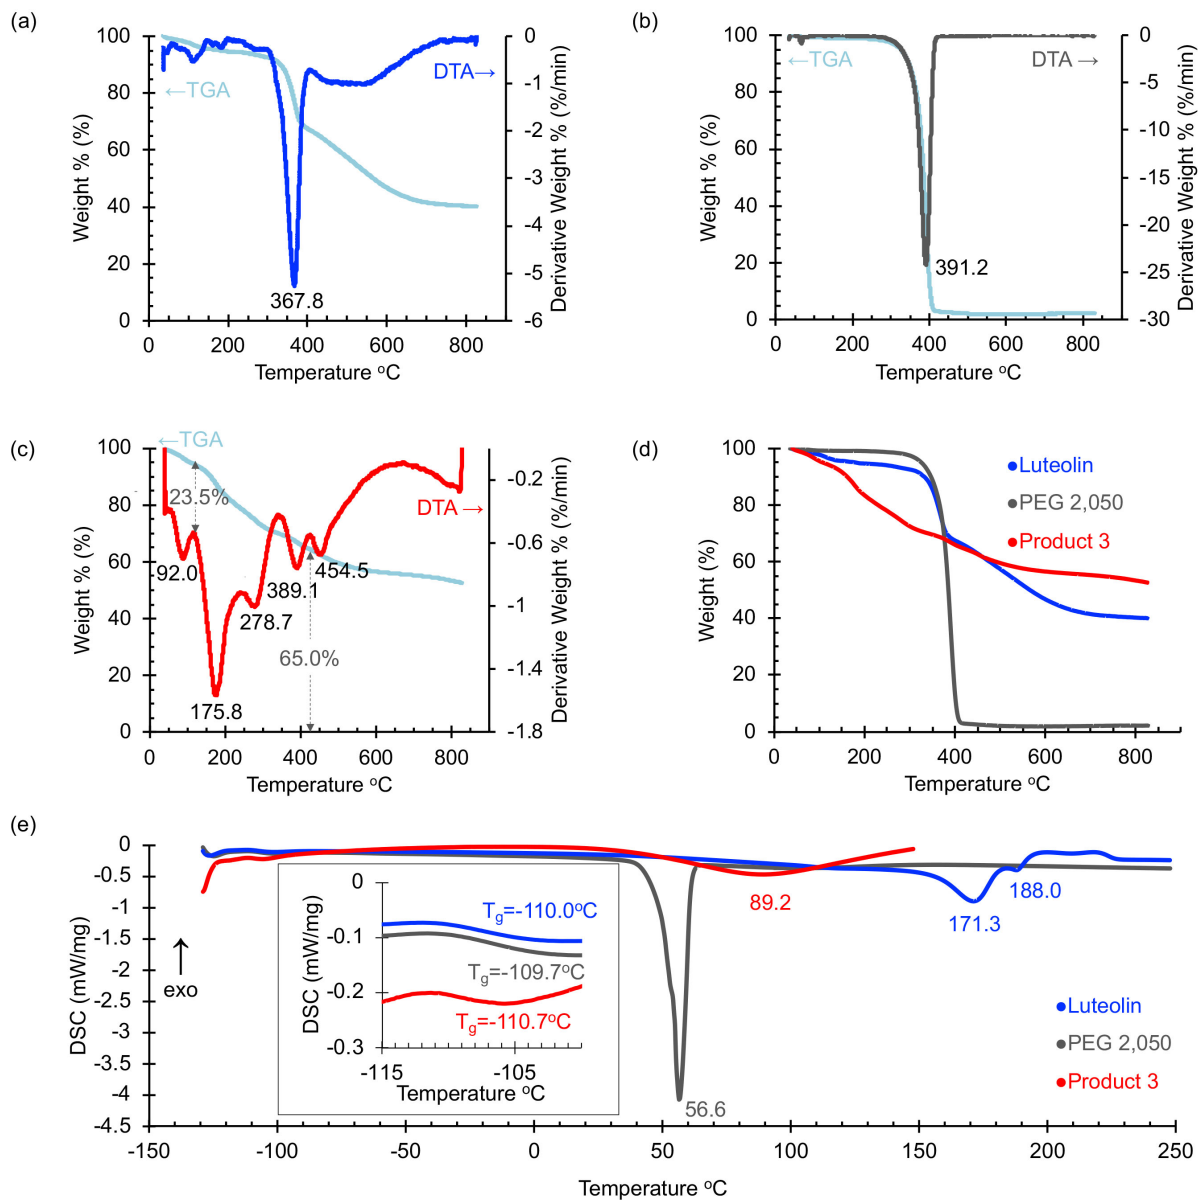

**Figure S4.** Thermal property of starting materials and Product 3: **TG-DTA curves** of luteolin (a), PEG 2050 (b), Product 3 (c); **TGA curves** of luteolin, PEG 2050, and Product 3 (d); **DSC curves** of luteolin, PEG 2050, and Product 3 (e).

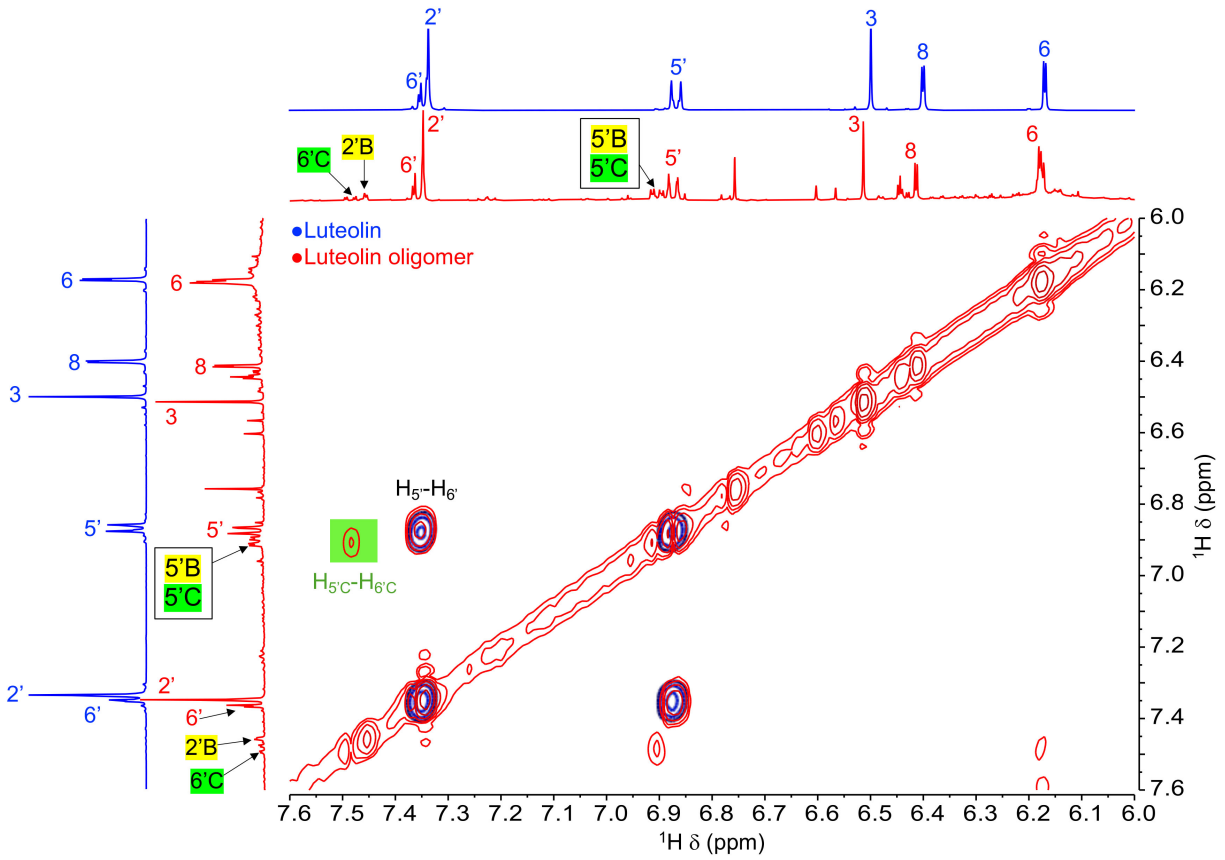

**Figure S5.** Overlay of  $^1\text{H}$ - $^1\text{H}$  COSY NMR correlations of luteolin and luteolin oligomers (MeOD- $d_4$ , 500 MHz).

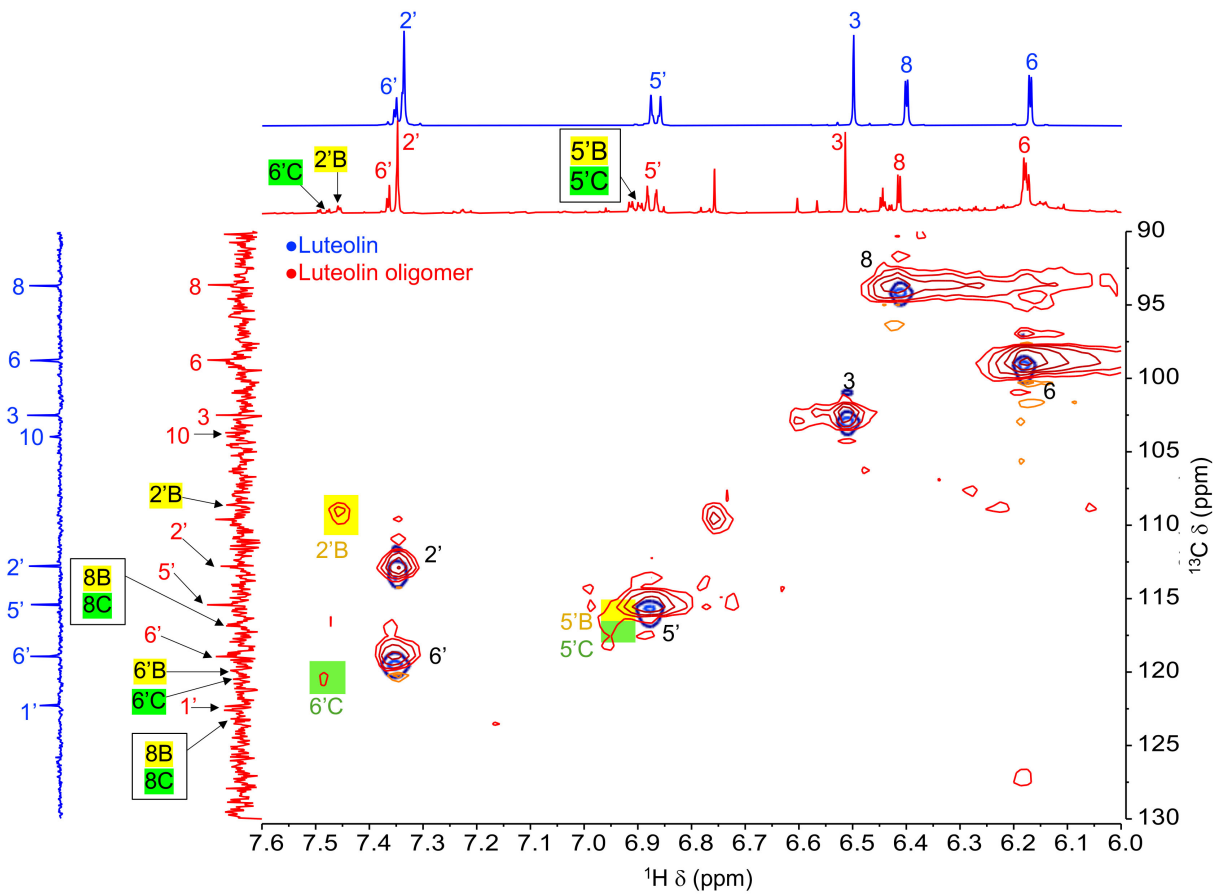

**Figure S6.** Overlay of  $^1\text{H}$ - $^{13}\text{C}$  HSQC NMR correlations of luteolin and luteolin oligomers (MeOD- $d_4$ , 500 MHz)

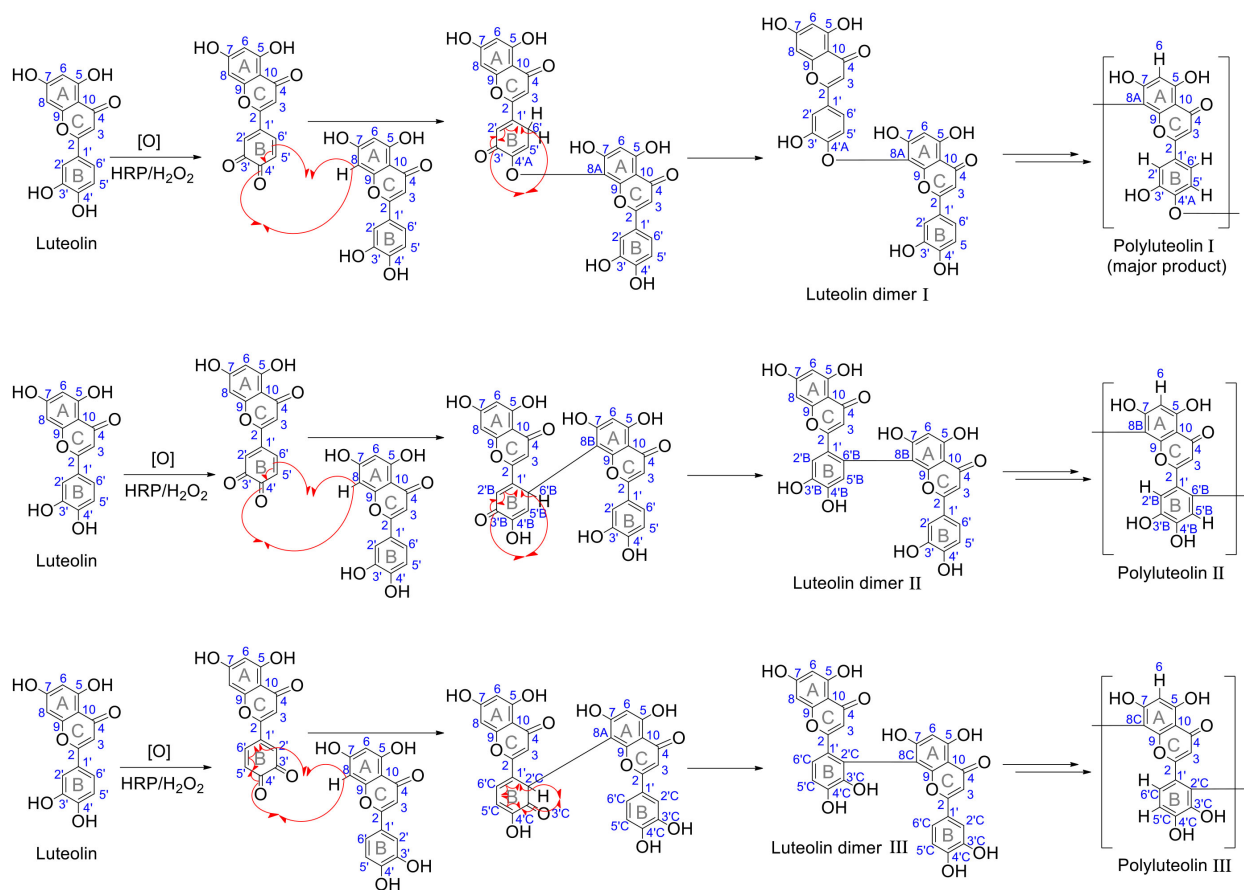

**Figure S7.** Three proposed structures and polymerization mechanism of the polymerized luteolin.

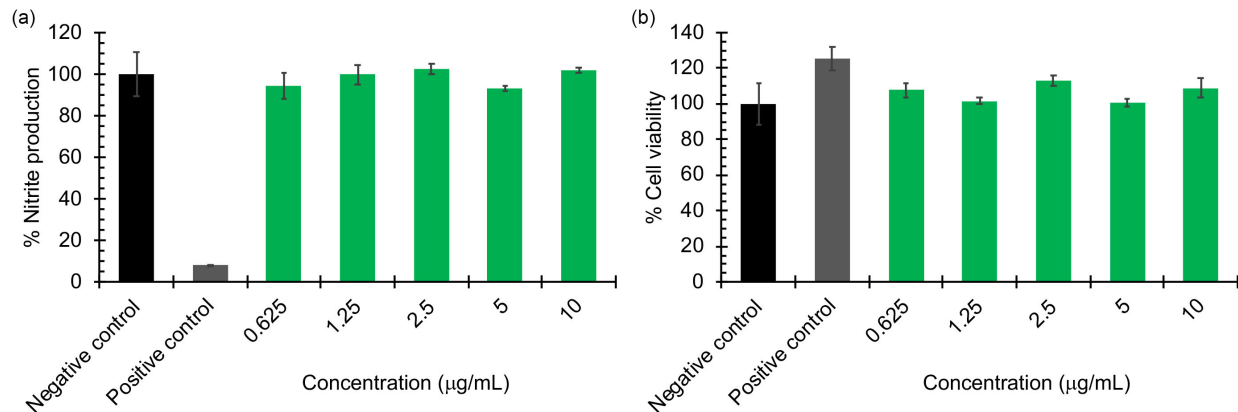

**Figure S8.** *In vitro* anti-inflammatory activity of PEG 2050: (a) %Nitrite production and (b) %Cell viability. Cells were incubated with various concentrations of PEG 2050 in aqueous suspension (10% relatively to the amounts of luteolin used in the reaction) for 1 h before stimulated with lipopolysaccharide (LPS) for 24 h. Nitrite levels in the culture supernatants were evaluated by the Griess reaction and cell viability was assessed using MTT assay. Cells treated with 1% water, IFN- $\gamma$  and LPS in complete media was used as a negative control and cells treated with 1% water in complete media was used as a positive control. Each bar graph represents an average with the error bar showing standard deviation obtained from 3 independent experiments.



**Table S1.** <sup>1</sup>H and <sup>13</sup>C NMR chemical shift of luteolin oligomer II and III (MeOD-d<sub>4</sub>, 500 MHz).

| Position | Luteolin oligomer II               |                         | Luteolin oligomer III                            |                         |
|----------|------------------------------------|-------------------------|--------------------------------------------------|-------------------------|
|          | <sup>1</sup> H δ (ppm), J (Hz)     | <sup>13</sup> C δ (ppm) | <sup>1</sup> H δ (ppm), J (Hz)                   | <sup>13</sup> C δ (ppm) |
| 2        | -                                  | 164.61                  | -                                                | 164.61                  |
| 3        | 6.51 (1H, s)                       | 102.50                  | 6.51 (1H, s)                                     | 102.50                  |
| 4        | -                                  | 182.23                  | -                                                | 182.23                  |
| 5        | -                                  | 161.94                  | -                                                | 161.94                  |
| 6        | 6.17 (1H, m)                       | 98.74                   | 6.17 (1H, m)                                     | 98.74                   |
| 7        | -                                  | 165.01                  | -                                                | 165.01                  |
| 8        | 6.41 (1H, d, 2.3)                  | 93.60                   | 6.41 (1H, d, 2.3)                                | 93.60                   |
| 8B       | -                                  | 123.12                  | -                                                | -                       |
| 8C       | -                                  | -                       | -                                                | 123.12                  |
| 9        | -                                  | 157.40                  | -                                                | 157.40                  |
| 10       | -                                  | 103.66                  | -                                                | 103.66                  |
| 1'       | -                                  | 122.40                  | -                                                | 122.40                  |
| 2'       | 7.35 (1H, m)                       | 112.73                  | 7.35 (1H, m)                                     | 112.73                  |
| 2'B      | 7.45 (1H, s) and<br>7.46 (1H, s)*  | 108.77                  | -                                                | -                       |
| 2'C      | -                                  | -                       | -                                                | N/A                     |
| 3'       | -                                  | 145.85                  | -                                                | 145.85                  |
| 3'B      | -                                  | 148.34                  | -                                                | -                       |
| 3'C      | -                                  | -                       | -                                                | 148.34                  |
| 4'       | -                                  | 149.65                  | -                                                | 149.65                  |
| 4'B      | -                                  | 150.77                  | -                                                | -                       |
| 4'C      | -                                  | -                       | -                                                | 150.77                  |
| 5'       | 6.87 (1H, dd, 8.9, 2.0)            | 115.38                  | 6.87 (1H, dd, 8.9, 2.0)                          | 115.38                  |
| 5'B      | 6.90 (1H, s) and<br>6.91 (1H, s)** | 116.58                  | -                                                | -                       |
| 5'C      | -                                  | -                       | 6.90 (1H, d, 8.59) and<br>6.91 (1H, d, 8.30)***  | 116.58                  |
| 6'       | 7.36 (1H, m)                       | 118.81                  | 7.36 (1H, m)                                     | 118.81                  |
| 6'B      | -                                  | 120.14                  | -                                                | -                       |
| 6'C      | -                                  | -                       | 7.48 (1H, d, 8.59) and<br>7.49 (1H, d, 8.30)**** | 120.52                  |

\* There are two singlet peaks for this H<sub>2'B</sub>, probably from two different configurations.

\*\* There are two singlet peaks for this H<sub>5'B</sub>, probably from two different configurations.

\*\*\* There are two sets of doublet for H<sub>5'C</sub>, probably from two different configurations.

\*\*\*\* There are two sets of doublet for H<sub>6'C</sub>, probably from two different configurations.
